# Supplementary material for: Association between the Inflammatory Potential of Diet and Stress among Female College Students
Source: PubMed Central journal article supplement (PMC7468951; doi:10.3390/nu12082389), 2020-08-10
Supplement: nutrients-12-02389-s001.pdf [file nutrients-12-02389-s001.pdf]

**Table S1. Descriptive characteristics of study participants (anthropometric measurements, biochemical data, PSS score, and E-DII score), n=401 <sup>1</sup>**

| Characteristics            | Mean   | ± SD   |
|----------------------------|--------|--------|
| Weight (kg)                | 60.29  | ±13.85 |
| Height (cm)                | 158.62 | ±5.59  |
| BMI (kg/m <sup>2</sup> )   | 24.05  | ±6.04  |
| Waist (cm)                 | 75.05  | ±11.49 |
| Hip (cm)                   | 101.49 | ±12.70 |
| Waist-to-hip ratio         | 0.75   | ±0.17  |
| Fat (%)                    | 35.11  | ±7.72  |
| Muscle (%)                 | 53.47  | ±13.59 |
| Hs-CRP (mg/l) <sup>2</sup> | 2.62   | ± 3.31 |
| PSS score                  | 20.12  | ± 6.13 |
| E-DII                      | 3.90   | ± 1.08 |

<sup>1</sup>Data are mean ± standard deviation (SD)

Body mass index (BMI), High sensitivity C reactive protein (hs-CRP), Perceived stress scale (PSS), Energy adjusted dietary inflammatory index (E-DII)

<sup>2</sup>Hs-CRP were collected from 289 participants

**Table S2. Dietary intakes of study participants across tertiles of E-DII, n=401 <sup>1,2</sup>**

| Variable                                 | Tertile 1               | Tertile 2             | Tertile 3             | P-value  |
|------------------------------------------|-------------------------|-----------------------|-----------------------|----------|
|                                          | (≤ 3.75)                | (3.76-4.40)           | (>4.40)               |          |
| <b>E-DII</b>                             |                         |                       |                       |          |
| n                                        | 133                     | 134                   | 134                   |          |
| Energy (Kcal/day)                        | 1710 (1607 – 1814)      | 2047 (1944 – 2151)    | 2393 (2289 – 2496)    | < 0.0001 |
| Carbohydrate (% E) <sup>2</sup>          | 58.1 (54.2 – 62.0)      | 49.3 (45.4 – 53.3)    | 45.3 (41.4 – 49.2)    | < 0.0001 |
| Protein (% E) <sup>2</sup>               | 21.9 (20.0 – 23.8)      | 21.8 (19.9 – 23.7)    | 21.9 (20.0 – 23.8)    | 0.98     |
| Fat (% E) <sup>2</sup>                   | 20.9 (18.8 – 22.0)      | 19.6 (17.5 – 21.6)    | 23.9 (21.8 – 29.6)    | 0.01     |
| SFA (% of total fat)                     | 13.0 (12.5 – 15.4)      | 11.6 (10.1 – 13.1)    | 13.8 (12.3 – 15.2)    | 0.05     |
| PUFA (% of total fat)                    | 4.6 (3.8 – 5.3)         | 3.3 (2.6 – 4.0)       | 2.6 (1.9 – 3.3)       | 0.01     |
| MUFA (% of total fat)                    | 3.9 (3.5 – 4.3)         | 3.4 (3.0 – 3.9)       | 3.3 (2.9 – 3.7)       | 0.13     |
| <b><i>Nutrients (per 1000 kcal)</i></b>  |                         |                       |                       |          |
| Cholesterol (mg)                         | 96.3 (88.7 – 104.0)     | 105.4 (97.8 – 113.0)  | 120.5 (112.9 – 128.2) | < 0.0001 |
| Trans fat (mg)                           | 1.2 (1.1-1.3)           | 1.3 (1.2-1.3)         | 1.5 (1.4-1.6)         | < 0.0001 |
| n-3 Fatty acids (gm)                     | 0.11 (0.1 – 0.1)        | 0.11 (0.1 – 0.1)      | 0.11 (0.1 – 0.1)      | 0.69     |
| n-6 Fatty acids (gm)                     | 0.8 (0.7 – 0.9)         | 0.9 (0.9 – 1.1)       | 0.9 (0.8 – 0.9)       | 0.12     |
| Fiber (gm)                               | 8.1 (7.7 – 8.5)         | 6.1 (5.7 – 6.5)       | 5.2 (4.8 – 5.6)       | < 0.0001 |
| Vit A (RE)                               | 107.9 (95.8 – 120.0)    | 83.5 (71.4 – 95.5)    | 74.9 (62.8 – 87.0)    | 0.0005   |
| Vit C (mg)                               | 10.4 (9.6 – 11.2)       | 9.6 (8.8 – 10.4)      | 7.9 (7.1 – 8.7)       | < 0.0001 |
| Vit E (mg)                               | 2.1 (1.8 – 2.3)         | 1.5 (1.3 – 1.7)       | 1.4 (1.2 – 1.6)       | < 0.0001 |
| Vit D (µg)                               | 2.0 (1.8 – 2.2)         | 1.3 (1.1 – 1.5)       | 1.3 (1.1 – 1.6)       | < 0.0001 |
| B12 (µg)                                 | 0.1 (0.1 – 0.2)         | 0.1 (0.1 – 0.1)       | 0.1 (0.1 – 0.1)       | 0.01     |
| B6 (mg)                                  | 0.1 (0.1 – 0.1)         | 0.1 (0.1 – 0.1)       | 0.1 (0.1 – 0.1)       | < 0.0001 |
| Thiamine (mg)                            | 0.1 (0.1 – 0.1)         | 0.1 (0.1 – 0.1)       | 0.1 (0.1 – 0.1)       | < 0.0001 |
| Riboflavin (mg)                          | 0.1 (0.1 – 0.1)         | 0.1 (0.1 – 0.1)       | 0.1 (0.1 – 0.1)       | < 0.0001 |
| Folic acid (µg)                          | 117.4 (104.9 – 130.0)   | 91.2 (78.7 – 103.7)   | 80.1 (67.6 – 92.7)    | 0.0002   |
| Niacin (mg)                              | 1.2 (1.1 – 1.4)         | 0.9 (0.8 – 1.1)       | 0.8 (0.6 – 0.9)       | < 0.0001 |
| Iron (mg)                                | 1.4 (1.3 – 1.6)         | 1.5 (1.3 – 1.6)       | 1.3 (1.2 – 1.5)       | 0.37     |
| Zinc (mg)                                | 1.5 (1.3 – 1.6)         | 1.2 (1.1 – 1.4)       | 1.1 (1.0 – 1.2)       | 0.0008   |
| Mg (mg)                                  | 54.8 (49.7 – 59.9)      | 46.7 (41.7 – 51.8)    | 42.8 (37.8 – 47.9)    | 0.01     |
| Selenium (µg)                            | 11.1 (10.3 – 11.9)      | 8.6 (7.8 – 9.4)       | 7.7 (6.9 – 8.5)       | < 0.0001 |
| Caffeine (gm)                            | 10.0 (6.9 – 13.1)       | 9.7 (6.6 – 12.8)      | 6.2 (3.1 – 9.3)       | 0.17     |
| Green/black tea (gm)                     | 137.3 (118.2– 156.3)    | 131.8 (112.7– 150.7)  | 95.5 (76.5 – 114.5)   | 0.005    |
| Garlic (gm)                              | 2.3 (2.0 – 2.6)         | 1.9 (1.6 – 2.2)       | 1.2 (0.9 – 1.5)       | < 0.0001 |
| Onion (gm)                               | 24.7 (21.2 – 28.2)      | 21.8 (18.3 – 25.3)    | 15.3 (11.8 – 18.8)    | 0.0008   |
| Ginger (gm)                              | 3.2 (0.9 – 5.5)         | 2.6 (0.4 – 4.9)       | 2.9 (0.6 – 5.2)       | 0.94     |
| Rosemary (mg)                            | 0.01 (-0.04 – 0.06)     | 0.06 (0.02 – 0.11)    | 0.04 (-0.01 – 0.09)   | 0.30     |
| Thyme/oregano (mg)                       | 3.5 (2.6 – 4.4)         | 2.6 (1.7 – 3.5)       | 1.5 (0.6 – 2.4)       | 0.01     |
| Pepper (gm)                              | 2.4 (1.8 – 3.1)         | 2.4 (1.7 – 3.0)       | 1.9 (1.3 – 2.6)       | 0.53     |
| Saffron (gm)                             | 0.9 (0.7 – 1.1)         | 0.8 (0.6 – 1.0)       | 0.7 (0.5 – 0.9)       | 0.46     |
| Turmeric (mg)                            | 0.3 (0.1 – 0.4)         | 0.3 (0.1 – 0.5)       | 0.5 (0.3 – 0.7)       | 0.11     |
| <b><i>Food Groups (gm/1000 kcal)</i></b> |                         |                       |                       |          |
| Whole grains                             | 34.6 (25.2 – 44.0)      | 41.1 (31.7 – 50.5)    | 35.2 (25.8 – 44.6)    | 0.57     |
| Fruits                                   | 142.8 (111.6 – 174.1)   | 156.3 (125.1 – 187.5) | 123.2 (92.0 – 154.4)  | 0.33     |
| Vegetables                               | 278.5.9 (232.6 – 324.4) | 251.1 (205.3 – 296.9) | 221.3 (175.5 – 267.1) | 0.22     |
| Nuts                                     | 21.1 (15.5 – 26.8)      | 12.4 (6.8 – 18.0)     | 12.5 (6.8 – 18.1)     | 0.05     |
| Legumes                                  | 27.4 (21.7 – 33.1)      | 27.2 (21.4 – 32.9)    | 19.3 (13.6 – 25.0)    | 0.08     |
| Vegetables oil                           | 22.2 (15.2 – 29.2)      | 29.0 (22.0 – 35.9)    | 36.9 (30.0 – 43.9)    | 0.01     |
| Tea and coffee                           | 345.1 (284.4 – 405.8)   | 257.3 (196.7 – 317.9) | 225.0 (164.3 – 285.6) | 0.02     |

|                                  |                       |                       |                       |        |
|----------------------------------|-----------------------|-----------------------|-----------------------|--------|
| Fruit juices                     | 48.8 (33.8 – 63.7)    | 43.9 (29.0 – 58.9)    | 52.4 (37.4 – 67.4)    | 0.73   |
| Refined grains                   | 227.8 (201.1 – 254.6) | 181.7 (155.0 – 208.4) | 146.2 (119.4 – 172.9) | 0.0001 |
| Potatoes                         | 42.3 (33.6 – 51.0)    | 41.9 (33.2 – 50.6)    | 36.7 (28.0 – 45.4)    | 0.60   |
| Sugar sweetened beverages        | 51.3 (35.2 – 67.4)    | 39.4 (23.3 – 55.5)    | 43.8 (27.7 – 59.9)    | 0.58   |
| Sweets and desserts              | 40.7 (34.7 – 46.6)    | 34.4 (28.5 – 40.5)    | 34.5 (28.5 – 40.5)    | 0.25   |
| Dairy products                   | 199.0 (171.2 – 226.9) | 159.0 (131.2 – 186.8) | 152.8 (125.0 – 180.7) | 0.04   |
| Egg                              | 24.3 (19.8 – 28.7)    | 18.2 (13.8 – 22.6)    | 15.3 (10.8 – 19.7)    | 0.02   |
| Fish and seafood                 | 16.0 (12.6 – 19.4)    | 16.1 (12.7 – 19.5)    | 11.2 (7.8 – 14.6)     | 0.07   |
| Meat                             | 40.0 (47.8 – 62.3)    | 47.2 (40.0 – 54.4)    | 56.0 (37.7 – 52.2)    | 0.05   |
| Miscellaneous animal-based foods | 39.4 (4.3– 59.0)      | 45.3 (4.3 – 53.7)     | 50.6 (4.3 – 47.7)     | 0.17   |

<sup>1</sup>Values are mean (95% CI)

<sup>2</sup>Percentage of daily energy intake (% E)

Saturated fatty acid (SFA %), Polyunsaturated fatty acid (PUFA %), Monounsaturated fatty acid (MUFA %), magnesium (Mg)

**Table S3. Pearson partial correlation between E-DII, anthropometrics, lifestyle variables and outcome variables for our study participants, n = 401<sup>1</sup>**

| <b>Variable</b>            | <b>PSS score</b> | <b>E-DII</b> | <b>BMI (kg/m<sup>2</sup>)</b> | <b>Waist-to-hip ratio</b> | <b>Fat %</b> | <b>Muscle %</b> |
|----------------------------|------------------|--------------|-------------------------------|---------------------------|--------------|-----------------|
| Family income (SR)         | -0.06            | -0.01        | 0.01                          | 0.02                      | 0.00         | -0.03           |
| Previous weight loss diet  | -0.12            | -0.23        | -0.43                         | -0.12                     | -0.44        | 0.22            |
| Special weight loss diet   | 0.07             | 0.18         | 0.38                          | 0.17                      | 0.37         | -0.21           |
| Previous weight loss / kg  | 0.06             | 0.11         | 0.33                          | 0.07                      | 0.29         | -0.09           |
| Duration of PA (min/day)   | 0.06             | 0.09         | -0.02                         | -0.07                     | 0.02         | -0.05           |
| The intensity of PA        | -0.01            | 0.04         | -0.08                         | -0.08                     | -0.05        | 0.06            |
| Frequency of PA/ week      | -0.01            | 0.06         | 0.04                          | -0.01                     | 0.06         | -0.27           |
| BMI (kg/m <sup>2</sup> )   | 0.17             | 0.33         | 1.00                          | 0.60                      | 0.76         | -0.30           |
| Waist-to-hip ratio         | 0.04             | 0.07         | 0.60                          | 1.00                      | 0.21         | -0.02           |
| Fat %                      | 0.25             | 0.39         | 0.76                          | 0.21                      | 1.00         | -0.51           |
| Muscle %                   | -0.12            | -0.36        | -0.30                         | -0.02                     | -0.51        | 1.00            |
| Hs-CRP (mg/l) <sup>2</sup> | 0.51             | 0.46         | 0.44                          | 0.28                      | 0.48         | -0.36           |
| E-DII                      | 0.46             | 1.00         | 0.33                          | 0.07                      | 0.39         | -0.36           |

<sup>1</sup>Correlations were significant between (-0.10 to 0.10)

Perceived stress scale (PSS), Saudi riyals (SR), Physical activity (PA), Body mass index (BMI), High sensitivity C reactive protein (hs-CRP), Energy adjusted dietary inflammatory index (E-DII).

<sup>2</sup> Hs-CRP were collected from 289 participants.
